CORRECTION

## Correction: Transcriptome-wide root causal inference

The *PLOS Computational Biology* Staff

### Notice of Republication

This article was republished on January 21, 2026, to correct errors that were introduced during the typesetting process. There was an error within the introduction where reference 20 was incorrectly formatted within the text. There was an error within the XML of the paper where a proof comment was erroneously kept. S1 Supplementary Materials is omitted from the list of Supporting Information. It can be viewed below.

The publisher apologizes for the errors. Please download this article again to view the correct version. The originally published, uncorrected article and the republished, corrected articles are provided here for reference.

### Supporting information

**S1 Supplementary Materials.** Extended results, replications, and proofs.  
(PDF)

**S1 File. Originally published, uncorrected article.**  
(PDF)

**S2 File. Republished, corrected article.**  
(PDF)

### Reference

1. Strobl EV, Gamazon ER. Transcriptome-wide root causal inference. *PLoS Comput Biol.* 2025;21(9):e1013461. <https://doi.org/10.1371/journal.pcbi.1013461> PMID: [40893109](https://pubmed.ncbi.nlm.nih.gov/40893109/)

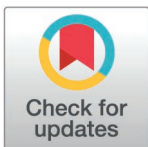

### OPEN ACCESS

**Citation:** The *PLOS Computational Biology* Staff (2026) Correction: Transcriptome-wide root causal inference. *PLoS Comput Biol* 22(2): e1013979. <https://doi.org/10.1371/journal.pcbi.1013979>

**Published:** February 18, 2026

**Copyright:** © 2026 The *PLOS Computational Biology* Staff. This is an open access article distributed under the terms of the [Creative Commons Attribution License](https://creativecommons.org/licenses/by/4.0/), which permits unrestricted use, distribution, and reproduction in any medium, provided the original author and source are credited.
